# Supplementary material
Source: Springer Nature journal article supplement (https://www.springermedizin.de/resource/supplementary/12885_2013_4204_MOESM12_ESM.pdf/9465756)

A

## p53 Immunohistochemistry in DSRCT samples

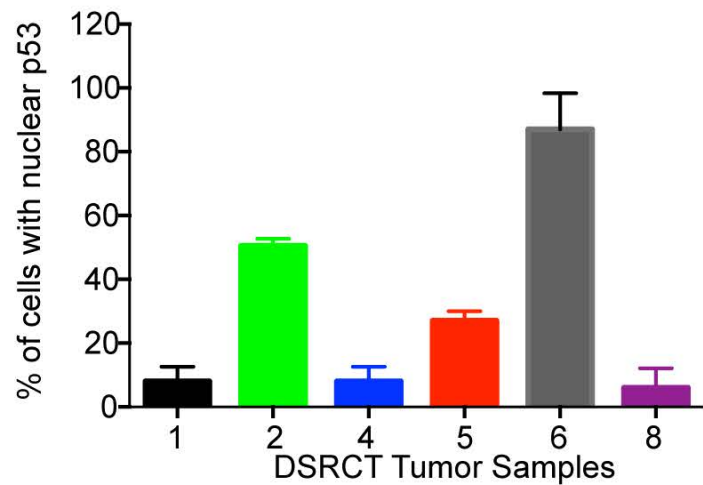

B

## Nuclear accumulation of p53 in DSRCT

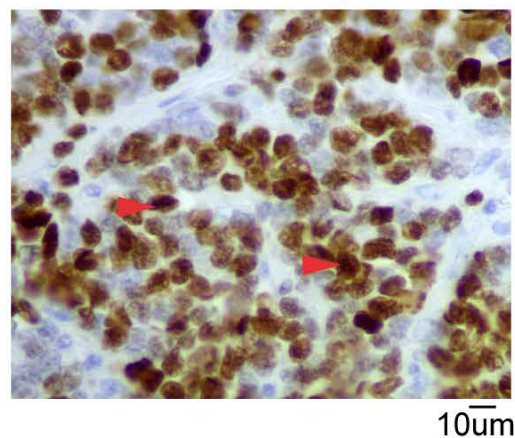

C

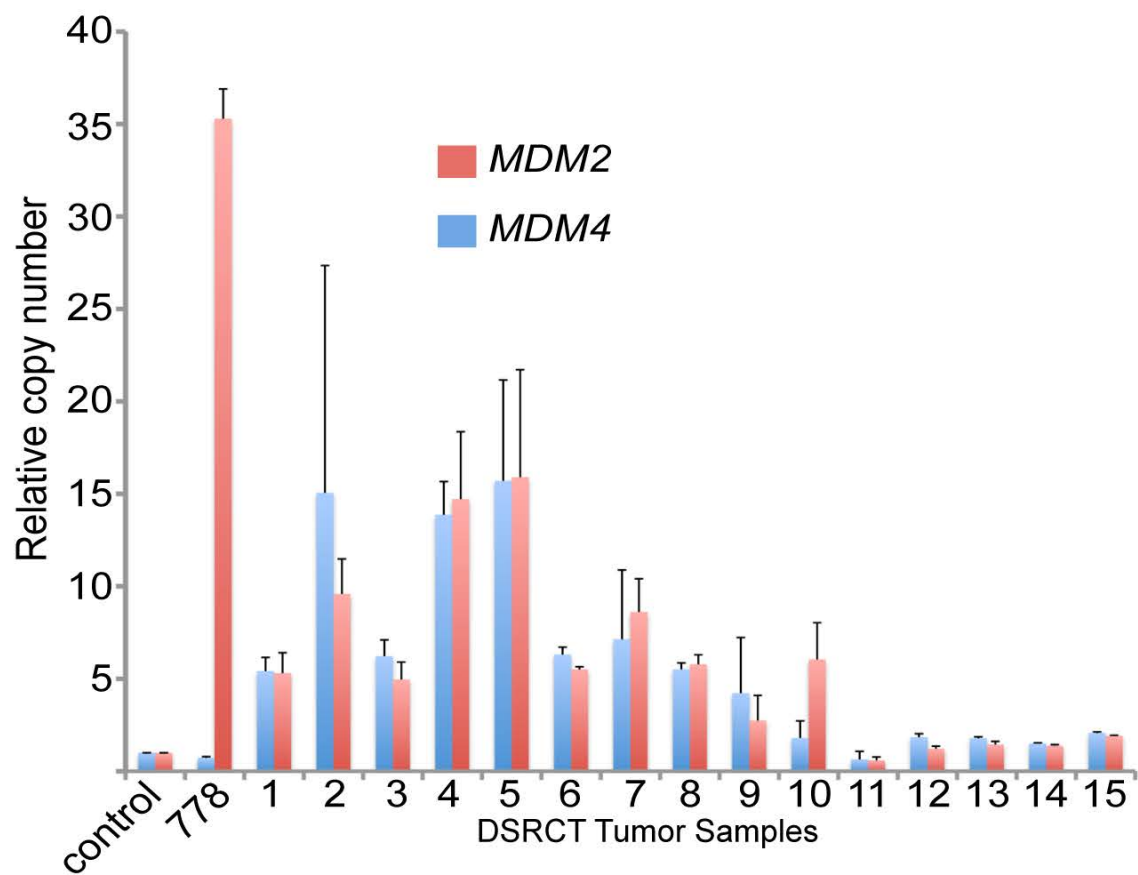

Supplement: MOESM12 [file 9465756]
